# Supplementary material
Source: Springer Nature journal article supplement (https://www.springermedizin.de/resource/supplementary/12936_2013_3152_MOESM5_ESM.pdf/9546286)
Supplement: MOESM5 [file 9546286]

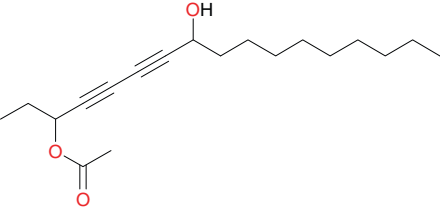

8-hydroxyheptadeca-4,6-diyne-3-yl acetate (47)

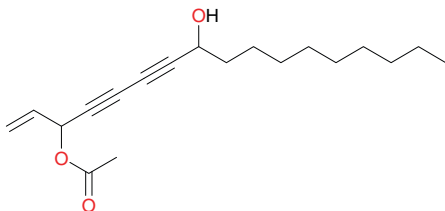

8-hydroxyheptadeca-1-ene-4,6-diyne-3-yl acetate (48)

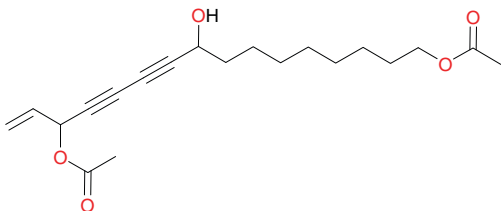

16-acetoxy-11-hydroxyoctadeca-17-ene-12,14-diyne acetate (49)

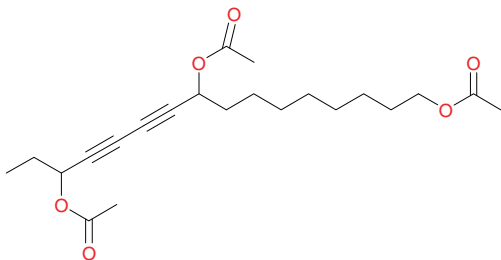

11,16-diacetoxyoctadeca-17-ene-12,14-diyne acetate (50)
